# Supplementary material for: Wnts acting through canonical and noncanonical signaling pathways exert opposite effects on hippocampal synapse formation
Source: PubMed Central journal article supplement (PMC2596118; doi:10.1186/1749-8104-3-32), 2008-11-05

P14 Cortex

|       |      |      |
|-------|------|------|
| Nissl | Wnt1 | Wnt4 |
|-------|------|------|

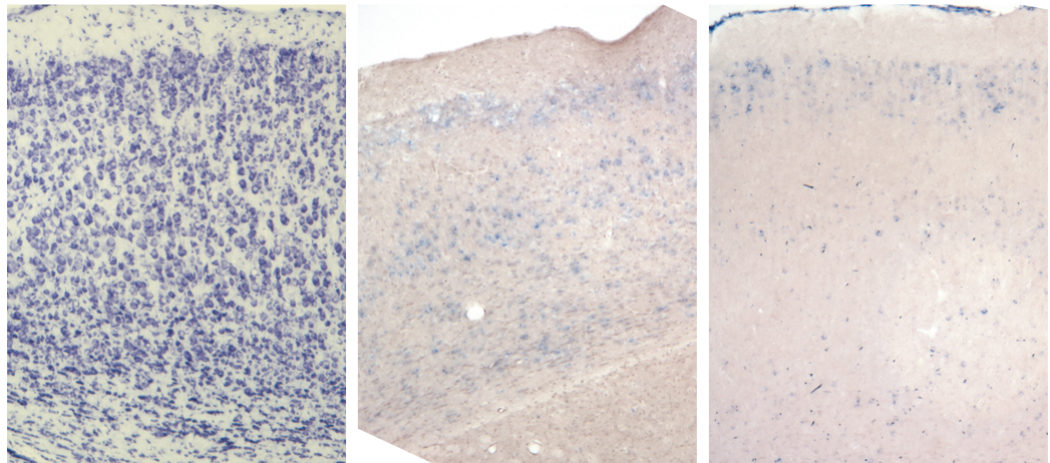

|       |       |       |
|-------|-------|-------|
| Wnt5a | Wnt7b | Wnt9a |
|-------|-------|-------|

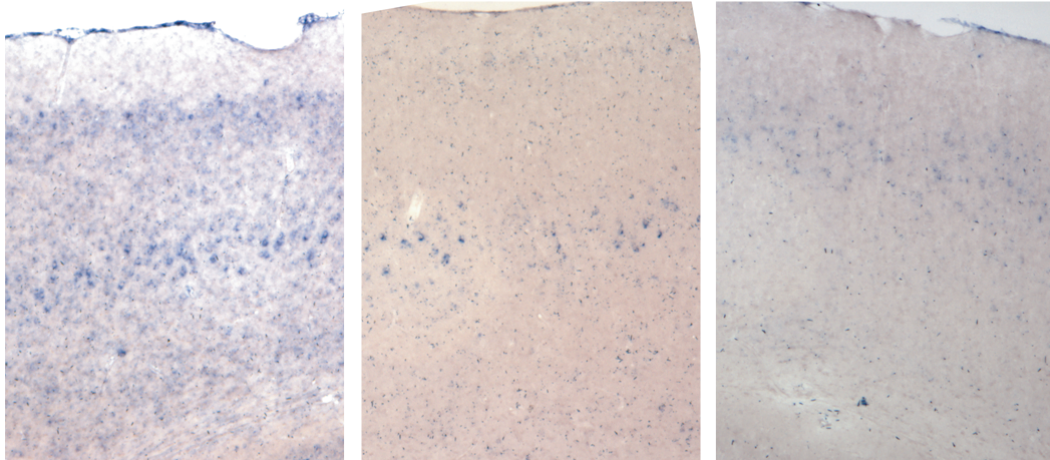

|       |
|-------|
| sFRP2 |
|-------|

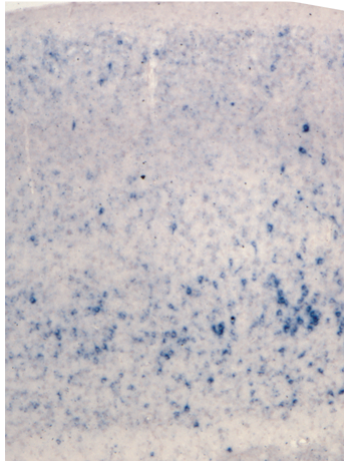

Supplement: 1749-8104-3-32-S1.pdf [file 1749-8104-3-32-S1.pdf]
