# Supplementary material for: Wnts acting through canonical and noncanonical signaling pathways exert opposite effects on hippocampal synapse formation
Source: PubMed Central journal article supplement (PMC2596118; doi:10.1186/1749-8104-3-32), 2008-11-05

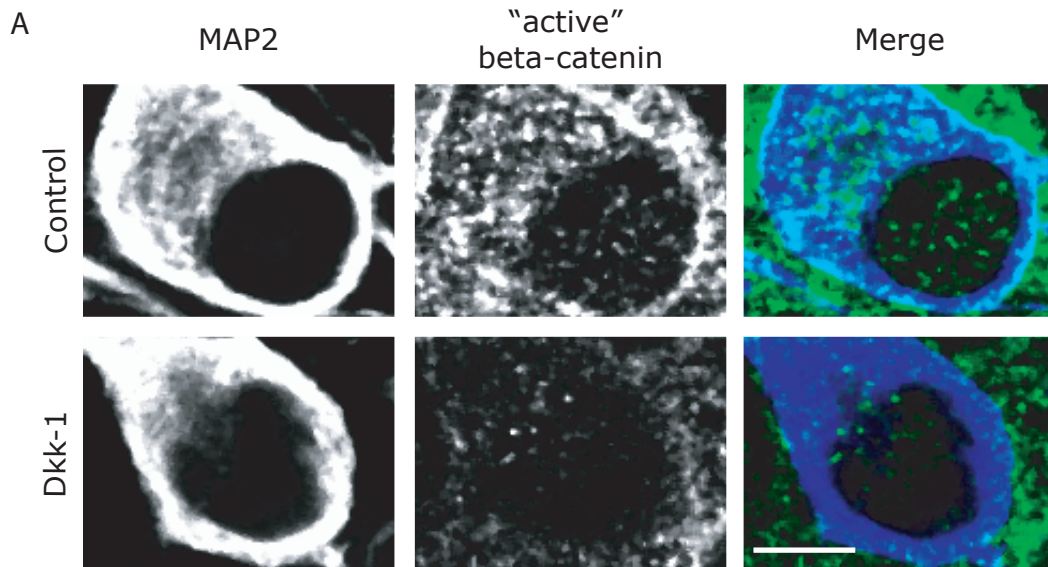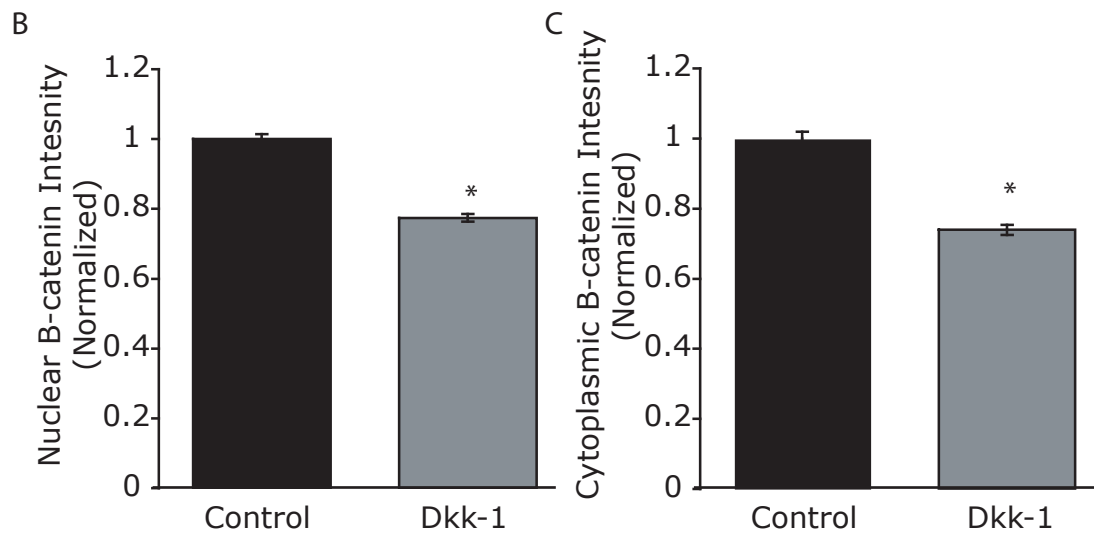

Supplement: 1749-8104-3-32-S5.pdf [file 1749-8104-3-32-S5.pdf]
